CORRECTION

# Correction: Genetic and Environmental Contributions to Facial Morphological Variation: A 3D Population-Based Twin Study

The *PLOS ONE* staff

The byline designation for the Visigen Consortium is incorrect. The correct name is: International Visible Trait Genetics (Visigen) Consortium, and the members can be found in the Acknowledgments section. The publisher apologizes for the error.

## Reference

1. Djordjevic J, Zhurov AI, Richmond S, Visigen Consortium (2016) Genetic and Environmental Contributions to Facial Morphological Variation: A 3D Population-Based Twin Study. *PLoS ONE* 11(9): e0162250. doi:[10.1371/journal.pone.0162250](https://doi.org/10.1371/journal.pone.0162250) PMID: [27584156](https://pubmed.ncbi.nlm.nih.gov/27584156/)

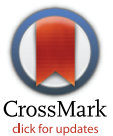

## OPEN ACCESS

**Citation:** The *PLOS ONE* staff (2016) Correction: Genetic and Environmental Contributions to Facial Morphological Variation: A 3D Population-Based Twin Study. *PLoS ONE* 11(10): e0164961. doi:[10.1371/journal.pone.0164961](https://doi.org/10.1371/journal.pone.0164961)

**Published:** October 12, 2016

**Copyright:** © 2016 The PLOS ONE staff. This is an open access article distributed under the terms of the [Creative Commons Attribution License](https://creativecommons.org/licenses/by/4.0/), which permits unrestricted use, distribution, and reproduction in any medium, provided the original author and source are credited.
